# Supplementary material
Source: PubMed Central journal article supplement (PMC9589931)

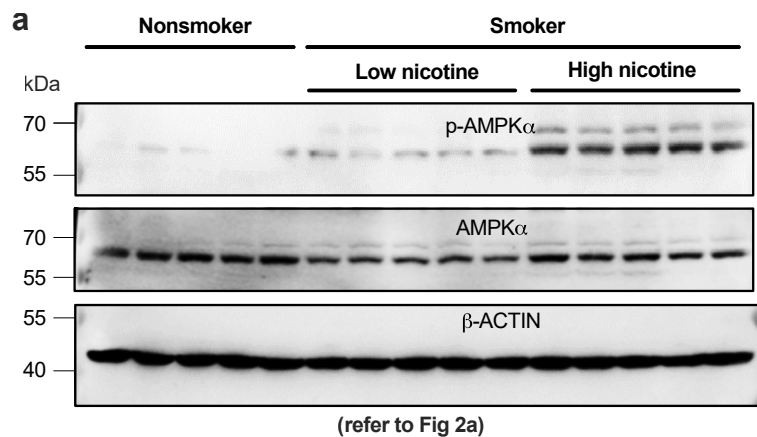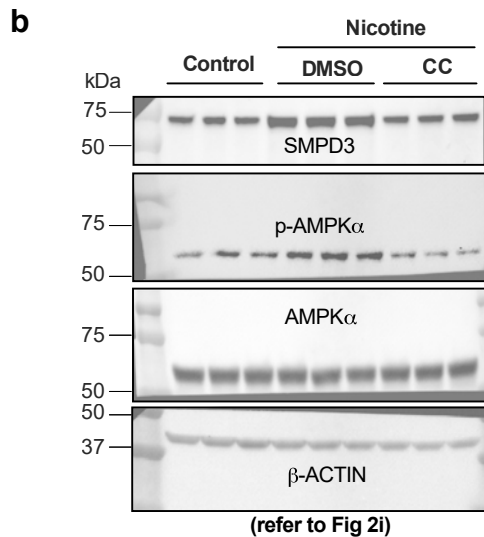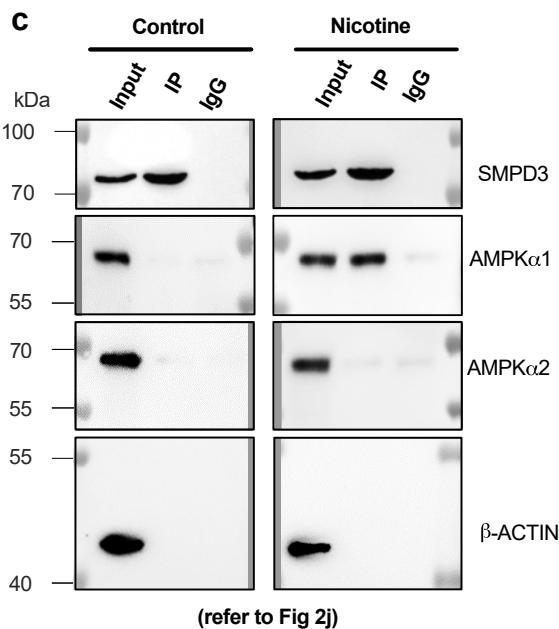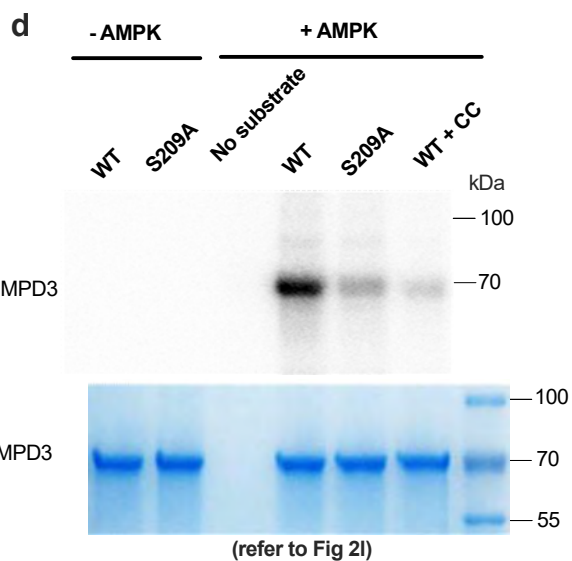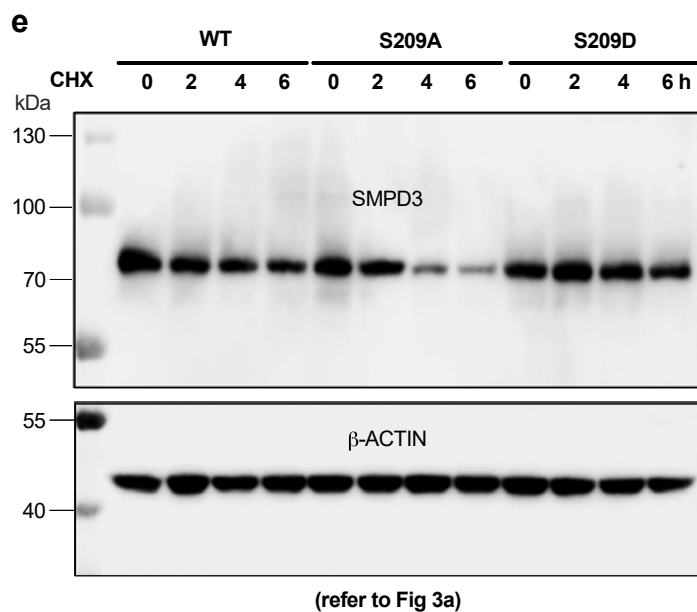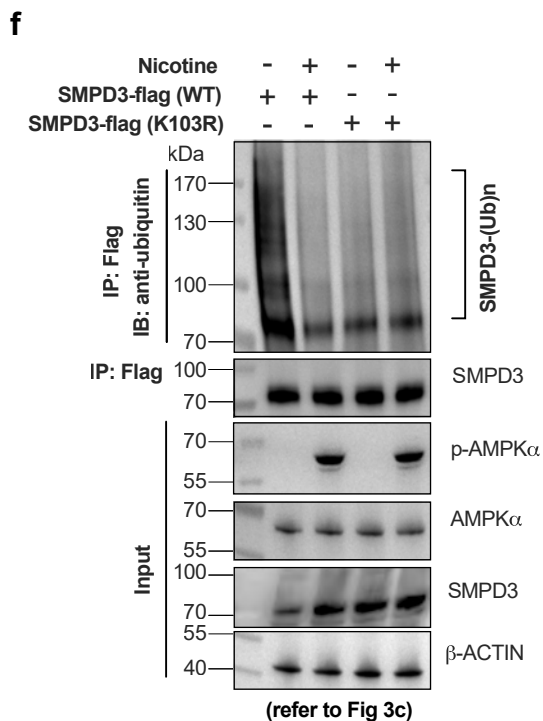

**g**

|                    |   |   |   |   |
|--------------------|---|---|---|---|
| Nicotine           | - | + | - | + |
| SMPD3-flag (WT)    | + | + | - | - |
| SMPD3-flag (K103R) | - | - | + | + |

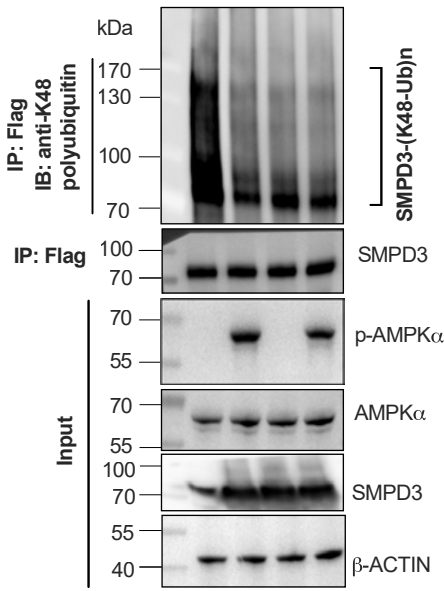

(refer to Fig 3d)

**h**

|                          |   |   |   |   |   |   |
|--------------------------|---|---|---|---|---|---|
| Nicotine                 | - | + | - | + | - | + |
| SMPD3-flag (WT)          | + | + | - | - | - | - |
| SMPD3-flag (S209A)       | - | - | + | + | - | - |
| SMPD3-flag (S209A/K103R) | - | - | - | - | + | + |

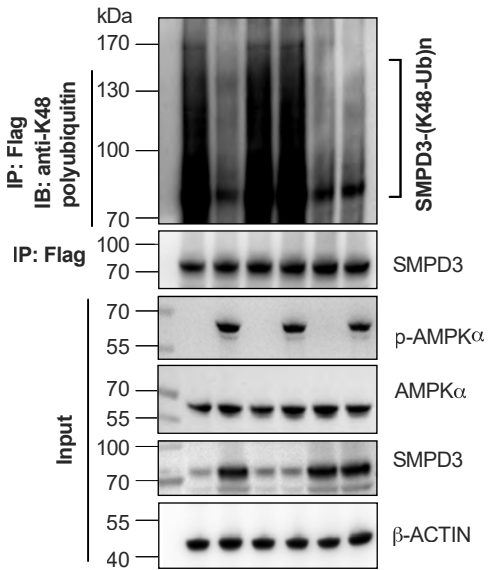

(refer to Fig 3e)

**i**

|                          |   |   |   |   |   |   |
|--------------------------|---|---|---|---|---|---|
| Nicotine                 | - | + | - | + | - | + |
| SMPD3-flag (WT)          | + | + | - | - | - | - |
| SMPD3-flag (S209A)       | - | - | + | + | - | - |
| SMPD3-flag (S209A/K103R) | - | - | - | - | + | + |

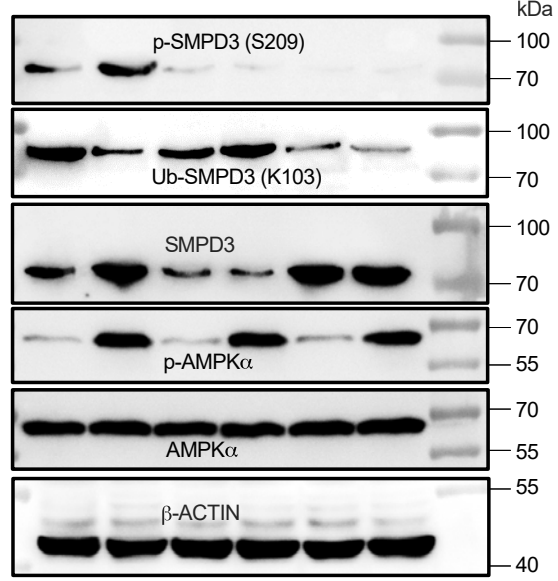

(refer to Fig 3f)

**j**

|                   |   |   |   |   |   |   |   |   |   |   |
|-------------------|---|---|---|---|---|---|---|---|---|---|
| Nicotine          | - | - | - | - | + | + | + | + | + | + |
| BX                | - | - | + | + | - | - | + | + | - | - |
| BX- $\Delta$ nicX | - | - | - | - | - | - | - | - | + | + |

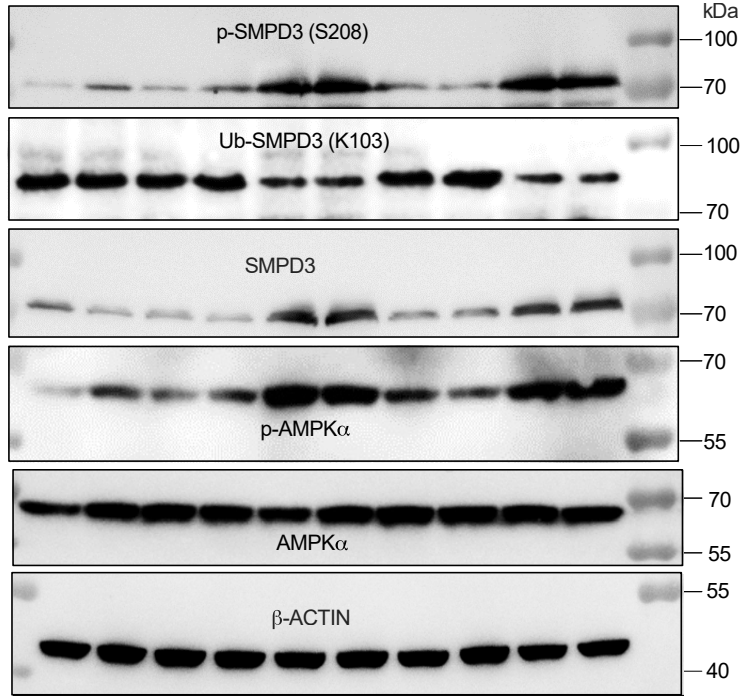

(refer to Fig 3h)

**k**

|           |  |  |  |              |  |               |  |
|-----------|--|--|--|--------------|--|---------------|--|
| Nonsmoker |  |  |  | Smoker       |  |               |  |
|           |  |  |  | Low nicotine |  | High nicotine |  |

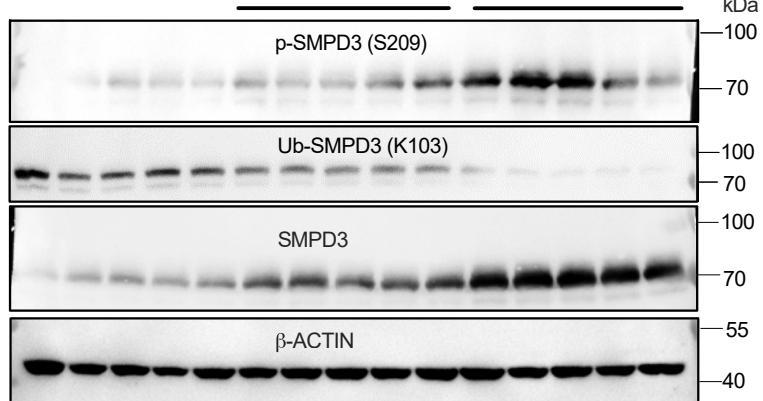

(refer to Fig 3i)

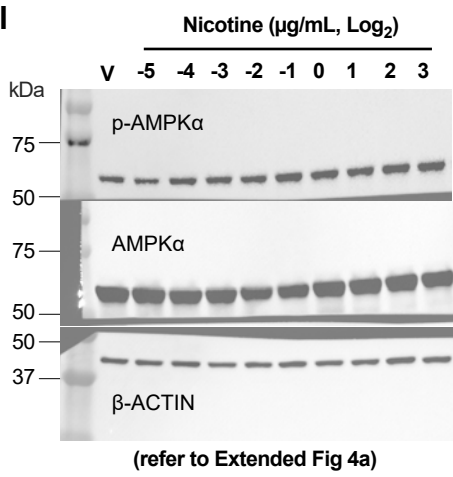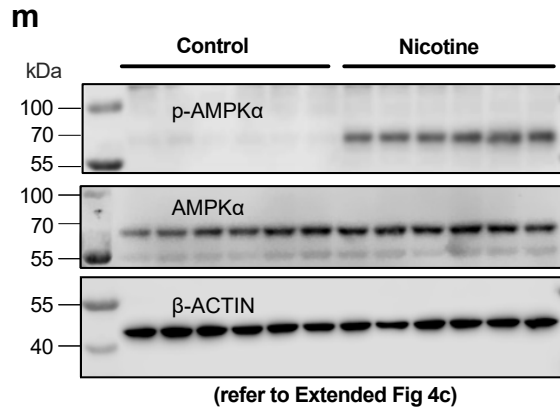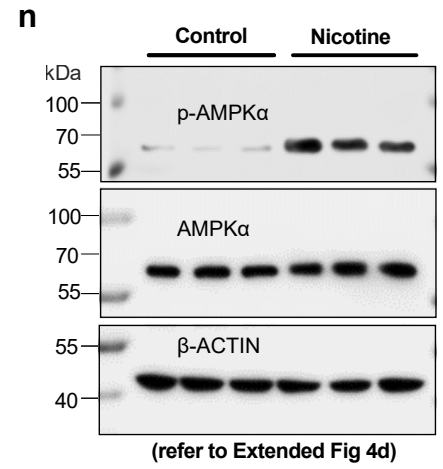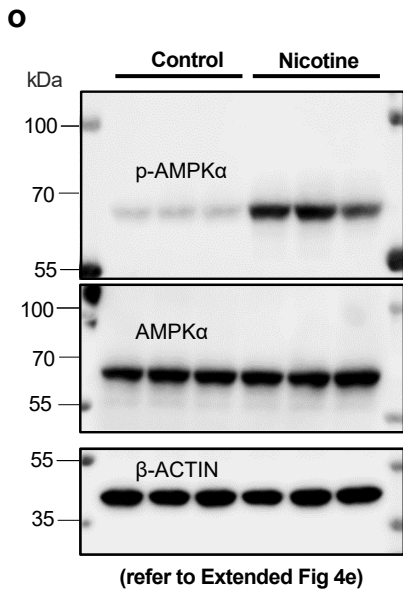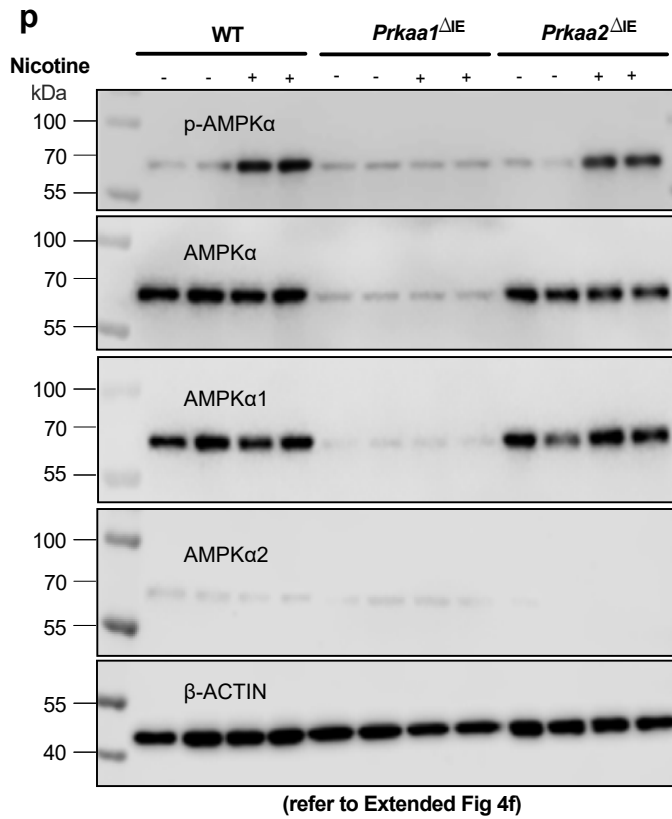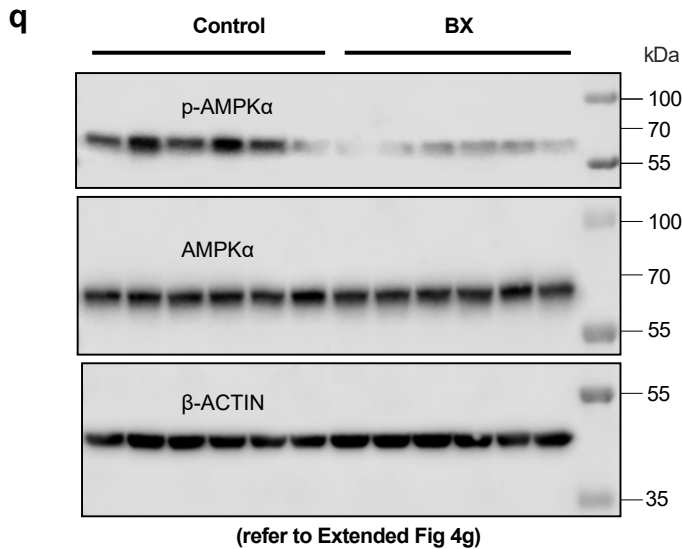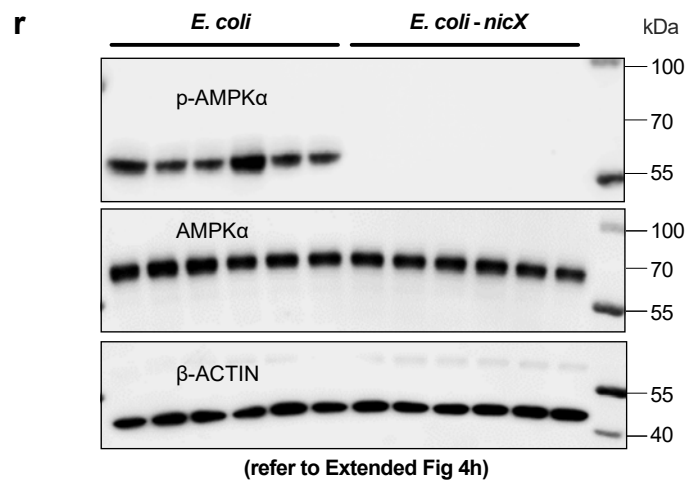

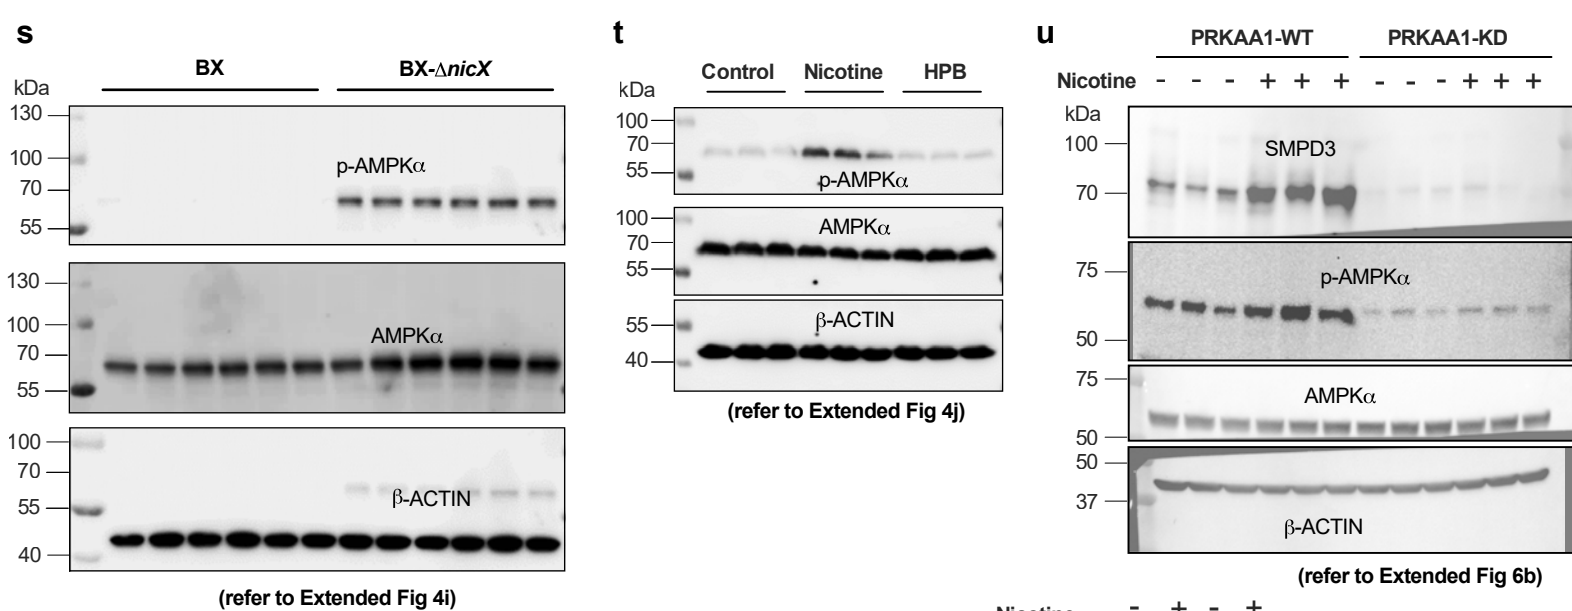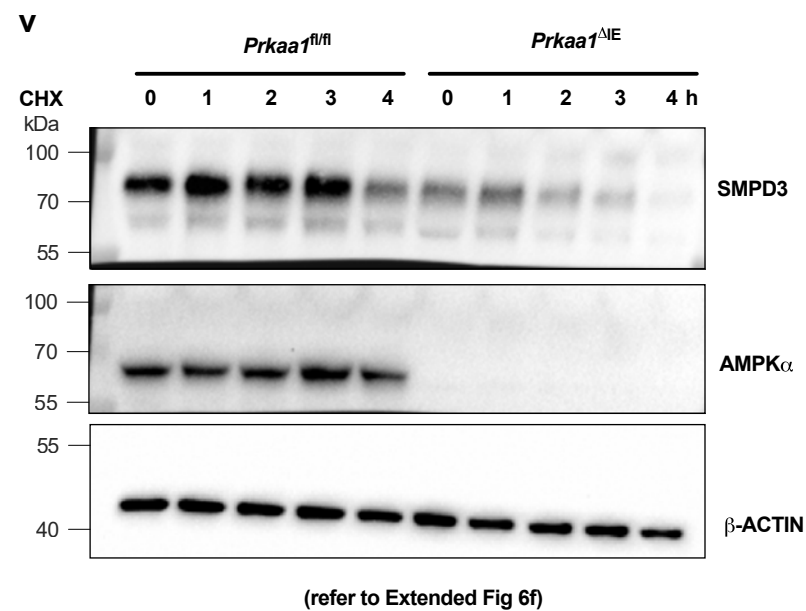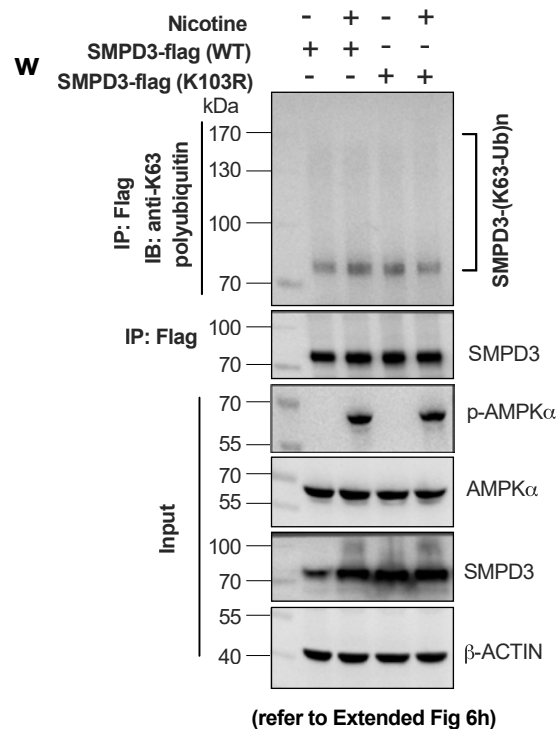



**x**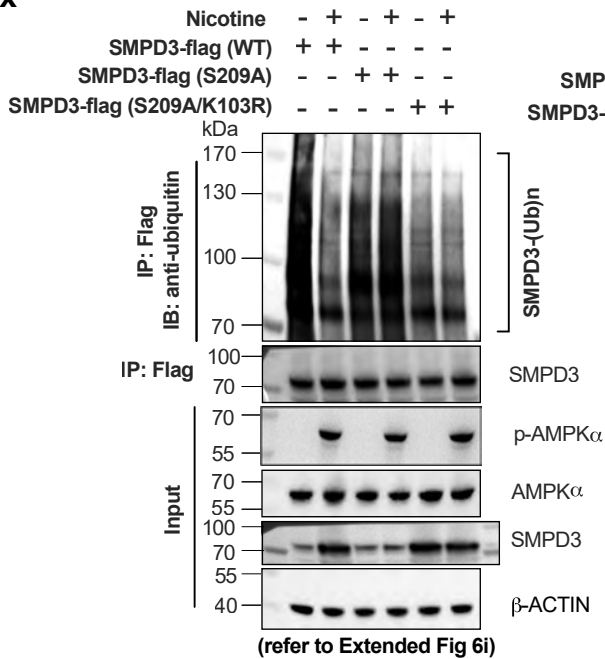**y**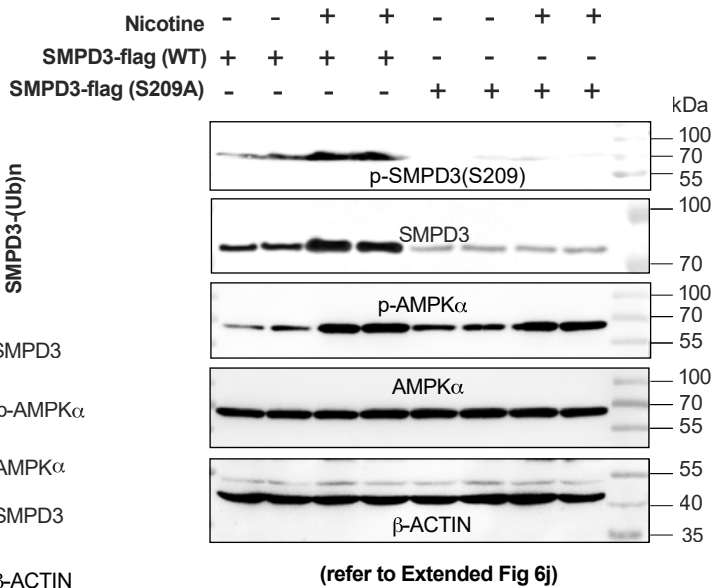**z**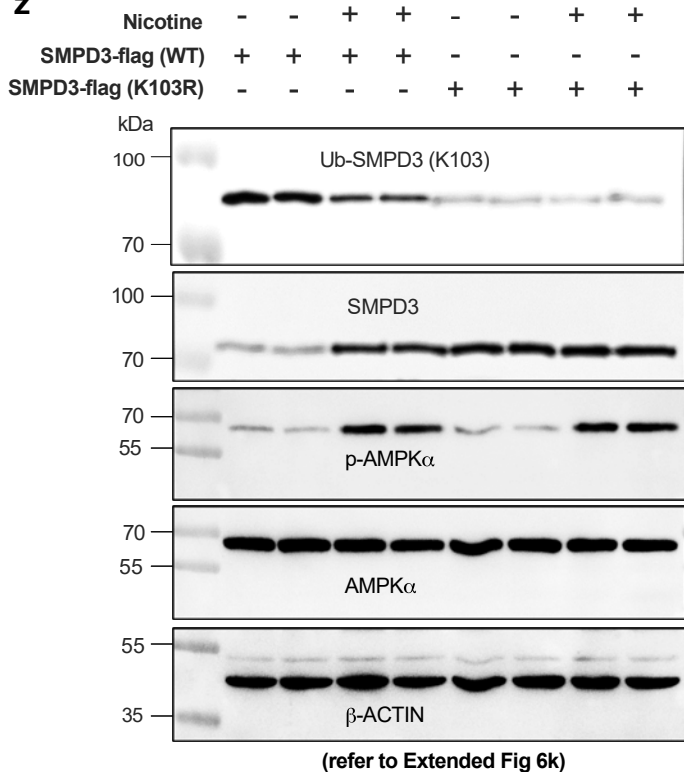**aa**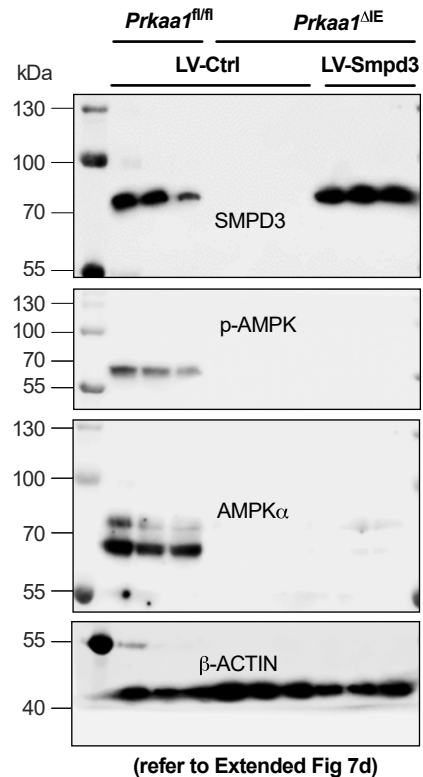

Supplement: NIHMS1838703-supplement-1838703_Sup_Info_Full_WB.pdf [file NIHMS1838703-supplement-1838703_Sup_Info_Full_WB.pdf]
